# Supplementary material for: The pattern of gene amplification of members of the Plasmodium vivax erythrocyte binding-like proteins family across the Amazon rainforest
Source: Research Square preprint supplement (doi:10.21203/rs.3.rs-7048749/v1), 2025-07-10
Supplement: Supplementary file 1 [file c94c018e9cd290ecacc880d1.docx]

**Table S1:** Primer sequences used for relative quantification of *dbp* and *ebp2* gene copy number variation by quantitative PCR (qPCR)

| **Gene** | **Primers name*** | **Sequence** |
| --- | --- | --- |
| *dbp* | CN_DBP_F | 5′- AATTATAAGAGAAAACGTCGGGAAAG -3′ |
| CN_DBP_R | 5′- ACCAAATTCGTAAGTTCCTTCATACA -3′ |
| *ebp2* | CN_EBP2_F | 5’- GGGGGAAGTACGAAAGATGAA -3’ |
| CN_EBP2_R | 5’- GGGGGAAGTACGAAAGATGAA -3’ |
| *β-tubulin* | CN_β-tubulin_F | 5′- CATGTTCGTTAAGATTTCCTGGT -3′ |
| CN_β-tubulin_R | 5′- GTTAGTGGTGCAAAACCAATCA -3′ |

*Described by Roesch et al., 2018 [25].

**Table S3.** Distribution of DARC genotypes across three Amazon regions (Western, Southwestern, and Eastern).

|  |  | **Western** | |  | **Southwestern** | |  | **Eastern** | | ***p*-value**** |
| --- | --- | --- | --- | --- | --- | --- | --- | --- | --- | --- |
| **Genotype** |  | **n** | **%** |  | **n** | **%** |  | **n** | **%** |
| ***FY*A/FY*A*** |  | 17 | 24 |  | 12 | 13 |  | 2 | 11 | 0.130 |
| ***FY*A/FY*BES*** |  | 12 | 17 |  | 15 | 16 |  | 2 | 11 | 0.778 |
| ***FY*B/FY*B*** |  | 8 | 11 |  | 22 | 24 |  | 7 | 36 | **0.025** |
| ***FY*B/FY*BES*** |  | 10 | 14 |  | 8 | 9 |  | 1 | 5 | 0.389 |
| ***FY*A/FY*B*** |  | 23 | 34 |  | 34 | 38 |  | 7 | 37 | 0.833 |
| **Total** |  | 70 | 100 |  | 91 | 100 |  | 19 | 100 | - |

** Comparisons were performed using Chi-square tests, with *p*-values < 0.05 considered statistically significant.

**Table S4.** *Plasmodium vivax* isolates (n = 26) with two or more copies of the dbp and/or ebp2 genes.

| **Amazon Region** | **State** | **Sample code** | **RQ *dbp* (mean)** | **RQ *ebp2* (mean)** | **Amplification (n)** |
| --- | --- | --- | --- | --- | --- |
| **Western** | AM | RP574B | 2.3 | 1.6 | **Both genes (10)** |
| RP602C | 2.3 | 2.5 |
| RP767C | 2.5 | 1.5 |
| RP279 | 2.8 | 1.7 |
| RP116 | 5.8 | 2.3 |
| RP120 | 7.8 | 1.5 |
| RP277C | 3.7 | 2.0 |
| RP573C | 5.2 | 2.0 |
| **Southwestern** | RO | PV-17-67 | 1.8 | 1.9 |
| **Eastearn** | PA | KSG-04 | 1.9 | 1.7 |
| **Western** | RR | BV-120 | 1.5 | 1.2 | ***dbp* (13)** |
| BV-130 | 1.5 | 0.7 |
| BV-95 | 1.8 | 0.8 |
| AM | RP323 | 1.9 | 1.1 |
| RP324 | 2.4 | 0.8 |
| RP573B | 2.7 | 0.8 |
| RP333C | 3.4 | 1.0 |
| RP589 | 4.8 | 1.2 |
| RP545B | 5.6 | 0.7 |
| RP264 | 7.5 | 1.1 |
| GUI | KSG-49 | 4.0 | 0.9 |
| **Southwestern** | AC | KSG-22 | 1.9 | 0.8 |
| **Eastern** | PA | KSG-34 | 1.7 | 0.8 |
| **Western** | AM | RP156 | 1.2 | 1.5 | ***ebp2* (3)** |
| RP059 | 1.3 | 1.5 |
| RP007 | 1.1 | 1.5 |

**RQ:** Relative Quantity of gene copy

**Table S5:** Distribution of *dbp* and *ebp2* Copy Number in the Study Population stratified according to DARC genotypes.

|  |  |  | ***dbp* copy** | | | | ***ebp2* copy** | | | |
| --- | --- | --- | --- | --- | --- | --- | --- | --- | --- | --- |
| **Genotypes** | **n** | **Frequency (%)** | **Single** | **Multiple** | **Multiple (%)** | ***p-value*** | **Single** | **Multiple** | **Multiple (%)** | ***p-value*** |
| ***FY*A/ FY*A*** | 31 | 17 | 26 | 5 | 16 | 0.75 | 28 | 3 | 10 | 0.74 |
| ***FY*A/FY*BES*** | 29 | 16 | 25 | 4 | 14 | 1.00 | 29 | 0 | 0 | N/A |
| ***FY*B/FY*B*** | 37 | 21 | 33 | 3 | 8 | 0.52 | 33 | 2 | 5 | 0.31 |
| ***FY*B/FY*BES*** | 19 | 10 | 16 | 3 | 16 | 0.72 | 13 | 0 | 0 | N/A |
| ***FY*A/FY*B*** | 64 | 36 | 52 | 8 | 12 | Ref. | 52 | 8 | 12 | Ref. |
| **Total** | 180 | 100 | 152 | 23 | N/A | - | 155 | 13 | N/A | - |

Multiple gene amplifications across DARC genotypes were compared using Fisher’s exact test with *FY*A/FY*B* as the reference (Ref.); all *p*-values were > 0.05 (not significant). N/A: not aplicable.
